# Supplementary material for: Effects of Salinity, pH, and Cu(II) on the Adsorption Behaviors of Tetracycline onto Polyvinyl Chloride Microplastics: A Site Energy Distribution Analysis
Source: MDPI journal article supplement (doi:10.3390/w15101925), 2023-05-19
Supplement: s1 [file s1]

## Article

# Effects of salinity, pH, and Cu (II) on the adsorption behaviors of tetracycline onto polyvinyl chloride microplastics: the site energy distribution analysis

Yifan Liang <sup>1</sup>, Chuhan Ying <sup>1</sup>, Jianyu Zhu <sup>2,3</sup>, Qian Zhou <sup>1</sup>, Kuan Sun <sup>3</sup>, Yajun Tian <sup>1,3\*</sup> and Jun Li <sup>1</sup>

## Supplementary Materials

### Text. S1 SED frequency function $F(E^*)$

“

$$F(E^*) = \frac{Q_g n (k_{LF} C_s)^n}{RT} \exp\left(\frac{-nE^*}{RT}\right) [1 + (k_{LF} C_s)^n \exp\left(\frac{-nE^*}{RT}\right)]^{-2} \quad (S1)$$

Eq. (S1) can be used to determine the SED curves ( $F(E^*)$ - $E^*$ ). In general, the number of adsorption sites can be determined by calculating the area under the SED curve, which also represents the maximum adsorption capacity. The SED curve's peak value  $F(E_0^*)$  denotes the most dispersed energy at the adsorption site. The peak value corresponds to the horizontal axis value of  $E_0^*$ , which de-notes the most distributed energy on the adsorbent surface.  $E_0^*$  can be calculated using the formula Eq (S2).

$$E_0^* = RT \ln(k_{LF} C_s) \quad (S2)$$

Additionally, there are two types of adsorption sites on the adsorbent surface, namely high-energy and low-energy sites. Here, the right side of  $E_0^*$  is the high-energy area and the left side is the low-energy area.

### Text. S2. The calculation of relative crystallinity

The crystallinity was calculated via relative crystallinity equation (Eq. S3).

$$X_c = \frac{I_c}{I_c + I_a} \times 100\% \quad (S3)$$

Where,  $I_c$  is the diffraction integral intensity of the crystalline part,  $I_a$  is the diffraction integral intensity of the amorphous part.

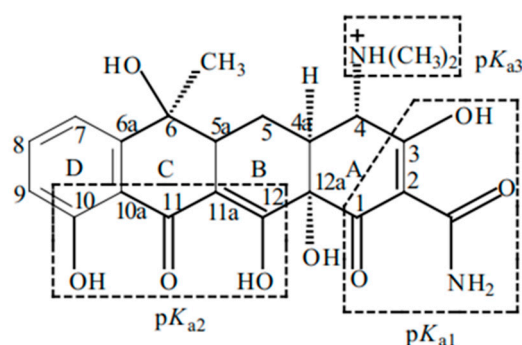

**Figure S1.** Molecular structure of tetracycline (TC).

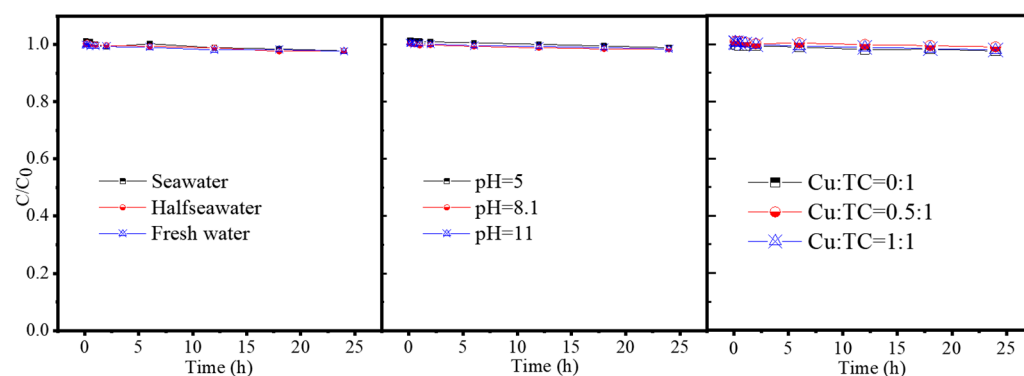

Figure S2. The control experiments for all explored conditions.

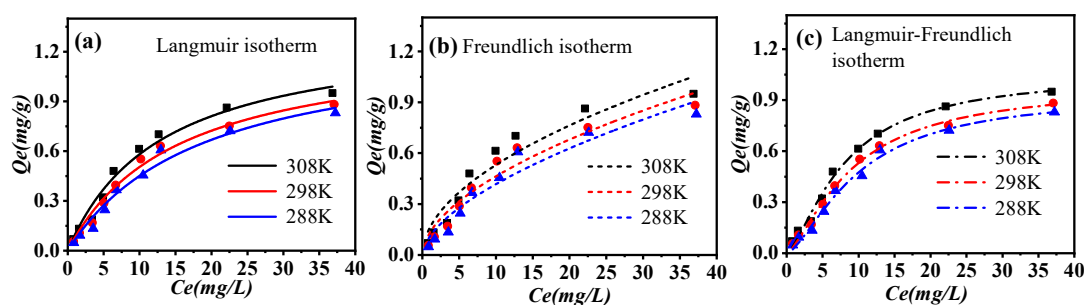

Figure S3. The sorption isotherm of virgin and aged PVC MPs at three temperatures.

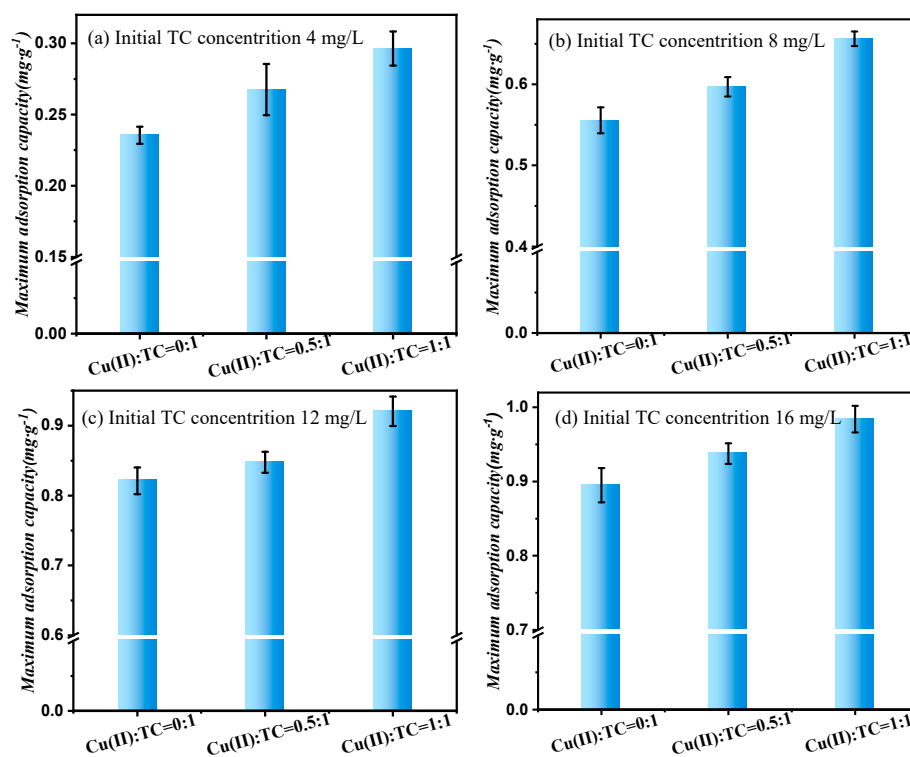

Figure S4. The adsorption of TC onto PVC MPs in the presence of  $\text{Cu}^{2+}$ .

**Table S1.** The results of BET test.

| Microplastics | BET surface area (m <sup>2</sup> /g) | Single point pore volume (cm <sup>3</sup> /g) | Average pore size (nm) |
|---------------|--------------------------------------|-----------------------------------------------|------------------------|
| PVC-MPs       | 1.9413                               | 0.003113                                      | 6.4147                 |

**Table S2.** Parameters for three sorption isotherms of virgin and aged PVC MPs and TC at three temperatures.

| T (K) | Langmuir Isotherm                  |                                    |                |                       | Freundlich Isotherm                |       |                |                       | Langmuir- Freundlich Isotherm      |       |                                     |                |                       |
|-------|------------------------------------|------------------------------------|----------------|-----------------------|------------------------------------|-------|----------------|-----------------------|------------------------------------|-------|-------------------------------------|----------------|-----------------------|
|       | Q <sub>m</sub> /mg·g <sup>-1</sup> | k <sub>L</sub> /L·mg <sup>-1</sup> | R <sup>2</sup> | Adjust R <sup>2</sup> | k <sub>F</sub> /mg·g <sup>-1</sup> | 1/n   | R <sup>2</sup> | Adjust R <sup>2</sup> | Q <sub>g</sub> /mg·g <sup>-1</sup> | n     | K <sub>LF</sub> /L·mg <sup>-1</sup> | R <sup>2</sup> | Adjust R <sup>2</sup> |
| 288K  | 1.293                              | 0.0536                             | 0.978          | 0.971                 | 0.107                              | 0.591 | 0.939          | 0.919                 | 0.943                              | 1.507 | 0.101                               | 0.990          | 0.987                 |
| 298K  | 1.275                              | 0.0656                             | 0.985          | 0.980                 | 0.129                              | 0.554 | 0.943          | 0.924                 | 0.990                              | 1.423 | 0.111                               | 0.995          | 0.993                 |
| 308K  | 1.339                              | 0.0768                             | 0.980          | 0.973                 | 0.159                              | 0.524 | 0.930          | 0.907                 | 1.061                              | 1.447 | 0.124                               | 0.991          | 0.988                 |

**Table S3.** The parameters of sorption kinetics for PVC MPs adsorbing TC.

| MPs | T (K) | Pseudo-first order              |                                    |                |                       | Pseudo-second order                                    |                                    |                |                       |
|-----|-------|---------------------------------|------------------------------------|----------------|-----------------------|--------------------------------------------------------|------------------------------------|----------------|-----------------------|
|     |       | k <sub>1</sub> /h <sup>-1</sup> | Q <sub>e</sub> /mg·g <sup>-1</sup> | R <sup>2</sup> | Adjust R <sup>2</sup> | k <sub>2</sub> /mg·(g·h <sup>0.5</sup> ) <sup>-1</sup> | Q <sub>e</sub> /mg·g <sup>-1</sup> | R <sup>2</sup> | Adjust R <sup>2</sup> |
| PVC | 288K  | 3.726                           | 0.367                              | 0.670          | 0.56                  | 14.696                                                 | 0.387                              | 0.868          | 0.824                 |
|     | 298K  | 3.225                           | 0.400                              | 0.767          | 0.689                 | 11.440                                                 | 0.423                              | 0.919          | 0.892                 |
|     | 308K  | 3.564                           | 0.481                              | 0.713          | 0.617                 | 10.811                                                 | 0.507                              | 0.895          | 0.860                 |

**Table S4.** The SED parameters of PVC MPs adsorbing TC in three salinity systems.

| MPs | Salinity         | E <sub>0</sub> * | F(E <sub>0</sub> *) | μ(E*)  | σ(E*) |
|-----|------------------|------------------|---------------------|--------|-------|
| PVC | Freshwater       | 19.974           | 174.532             | 20.971 | 2.729 |
|     | Half of seawater | 19.871           | 160.967             | 20.969 | 2.718 |
|     | Seawater         | 19.740           | 142.153             | 20.948 | 2.702 |
